# Supplementary material for: Dual-phased Mo2C/Mo3N2/C nanosheets for efficient electrocatalytic hydrogen evolution
Source: Royal Society of Chemistry journal article supplement (doi:10.1039/d2ta09813j), 2023-01-01
Supplement: d2ta09813j1.pdf [file d2ta09813j1.pdf]

## Supplementary Material

### Dual-phased Mo<sub>2</sub>C/Mo<sub>3</sub>N<sub>2</sub>/C nanosheets for efficient electrocatalytic hydrogen evolution

Guangyan Tian,<sup>a,c,#</sup> Bingxue Yao,<sup>a,#</sup> Gaofeng Han,<sup>b,\*</sup> Yan Li,<sup>a</sup> Kefeng Zhang,<sup>a</sup> and  
Junping Meng<sup>a\*</sup>

<sup>a</sup>Key laboratory of special Functional Materials for Ecological Environment and Information, Hebei University of Technology, Ministry of Education, Tianjin 300130, P.R. China.

<sup>b</sup>School of Materials Science and Engineering, Tianjin Chengjian University, Tianjin 300384, P.R. China.

<sup>c</sup>School of Materials Science and Engineering, Hebei University of Technology, Tianjin 300130, P.R. China.

<sup>#</sup>Co-first author.

**Corresponding author:** Email: [hangaofeng@tcu.edu.cn](mailto:hangaofeng@tcu.edu.cn); [mengjunping@hebut.edu.cn](mailto:mengjunping@hebut.edu.cn)

## Supporting discussion

Based on the linear fitting of Figure 4d and Figure 5c, we can obtain its specific capacitance as follows:

(Where  $C_{dl}$  is the fitting slope,  $m$  is the catalyst loading mass. we can calculate its ECSA by assuming a standard value of  $40 \mu\text{F}/\text{cm}^2$ ).

Under 1M KOH condition:

$$ECSA_{(\text{Carbon})} = \frac{Cdl}{m} \times \frac{1}{40 \mu\text{F cm}^{-2}} = \frac{6.67 \text{ mF cm}^{-2}}{1.42 \text{ mg cm}^{-2}} \times \frac{1}{0.04 \text{ mF cm}^{-2}} \approx 117.43 \text{ cm}^2 \text{ mg}^{-1}$$

$$ECSA_{(\text{Mo}_2\text{C}/\text{C})} = \frac{Cdl}{m} \times \frac{1}{40 \mu\text{F cm}^{-2}} = \frac{50.44 \text{ mF cm}^{-2}}{1.42 \text{ mg cm}^{-2}} \times \frac{1}{0.04 \text{ mF cm}^{-2}} \approx 888.03 \text{ cm}^2 \text{ mg}^{-1}$$

$$ECSA_{(\text{Mo}_3\text{N}_2/\text{C})} = \frac{Cdl}{m} \times \frac{1}{40 \mu\text{F cm}^{-2}} = \frac{20.31 \text{ mF cm}^{-2}}{1.42 \text{ mg cm}^{-2}} \times \frac{1}{0.04 \text{ mF cm}^{-2}} \approx 357.57 \text{ cm}^2 \text{ mg}^{-1}$$

$$ECSA_{(\text{Mo}_2\text{C}/\text{Mo}_3\text{N}_2/\text{C})} = \frac{Cdl}{m} \times \frac{1}{40 \mu\text{F cm}^{-2}} = \frac{94.92 \text{ mF cm}^{-2}}{1.42 \text{ mg cm}^{-2}} \times \frac{1}{0.04 \text{ mF cm}^{-2}} \approx 1671.13 \text{ cm}^2/\text{mg}$$

Under 0.5M  $\text{H}_2\text{SO}_4$  condition:

$$ECSA_{(\text{Carbon})} = \frac{Cdl}{m} \times \frac{1}{40 \mu\text{F cm}^{-2}} = \frac{4.76 \text{ mF cm}^{-2}}{1.42 \text{ mg cm}^{-2}} \times \frac{1}{0.04 \text{ mF cm}^{-2}} \approx 83.80 \text{ cm}^2 \text{ mg}^{-1}$$

$$ECSA_{(\text{Mo}_2\text{C}/\text{C})} = \frac{Cdl}{m} \times \frac{1}{40 \mu\text{F cm}^{-2}} = \frac{29.38 \text{ mF cm}^{-2}}{1.42 \text{ mg cm}^{-2}} \times \frac{1}{0.04 \text{ mF cm}^{-2}} \approx 517.25 \text{ cm}^2 \text{ mg}^{-1}$$

$$ECSA_{(\text{Mo}_3\text{N}_2/\text{C})} = \frac{Cdl}{m} \times \frac{1}{40 \mu\text{F cm}^{-2}} = \frac{14.39 \text{ mF cm}^{-2}}{1.42 \text{ mg cm}^{-2}} \times \frac{1}{0.04 \text{ mF cm}^{-2}} \approx 253.35 \text{ cm}^2 \text{ mg}^{-1}$$

$$ECSA_{(\text{Mo}_2\text{C}/\text{Mo}_3\text{N}_2/\text{C})} = \frac{Cdl}{m} \times \frac{1}{40 \mu\text{F cm}^{-2}} = \frac{76.35 \text{ mF cm}^{-2}}{1.42 \text{ mg cm}^{-2}} \times \frac{1}{0.04 \text{ mF cm}^{-2}} \approx 1344.19 \text{ cm}^2/\text{mg}$$

The TOF value is obtained by following equation:

$$\text{TOF} = \frac{J \times A}{N \times F \times n} \quad (1)$$

(Where J is the measured current density, A is geometric area of the electrode, N is the number of electrons required for reaction, F is Faraday constant and n is the number of active sites)<sup>[1]</sup>.

### DFT Calculations

All the density functional theory (DFT) calculations were carried out using Vienna Ab-initio Simulation Package (VASP)<sup>[2]</sup>, employing the Projected Augmented Wave (PAW) method<sup>[3]</sup>. As has been proved effective, the revised Perdew-Burke-Ernzerhof (RPBE) functional was used to treat the exchange and correlation effects. The surface of Mo<sub>2</sub>C/Mo<sub>3</sub>N<sub>2</sub> with ~15 Å vacuum was simulated to represent the catalytic interface. The K points meshing for Brillouin zone was set up as a 3×3×1 grid centered at the gamma point regarding Monkhorst Pack Scheme for geometric optimization of the slab surfaces. All atoms are fully relaxed, the total energy change is less than 10<sup>-5</sup> eV, the force on each ion is less than 0.02eV/Å. A cutoff energy of 450 eV is set and the forces were converged to 0.02 eV/Å for all calculations. Adsorption energy was calculated by subtracting the energies of gas phase species and clean surface from the total energy of the absorbed system:

$$\Delta G H^* = \Delta E H + \Delta E Z P E - T \Delta S H \quad (2)$$

where  $\Delta E H$  is the binding energy of hydrogen atom,  $\Delta E Z P E$  is the difference in zero-point energy between the adsorbed hydrogen and the gaseous hydrogen gas, and

$T\Delta S_H$  is the entropy difference for the two states. We have calculated a 0.30 eV value in this work to stand for the contribution of zero-point energy and entropy. And a more negative indicates a more stable adsorption.

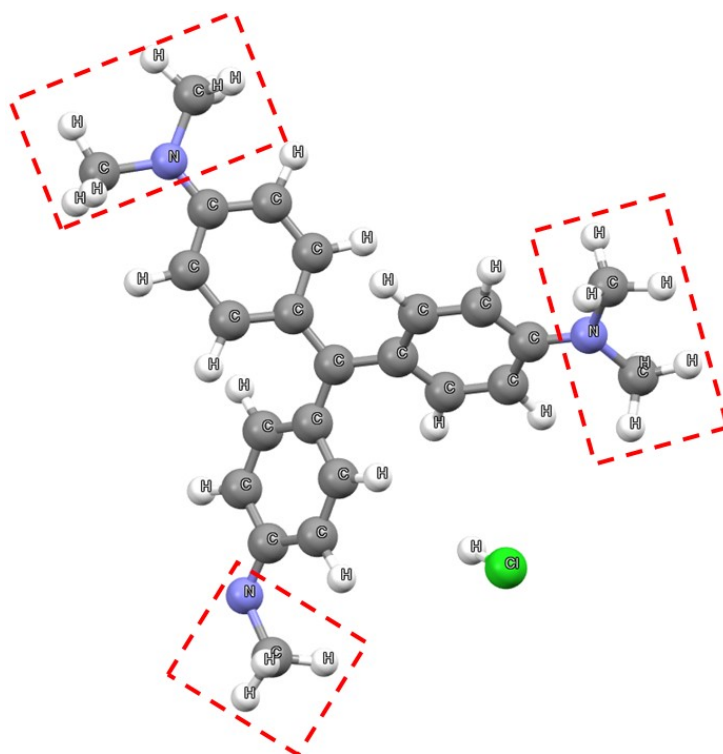

**Figure S1.** Molecular structure of methyl violet

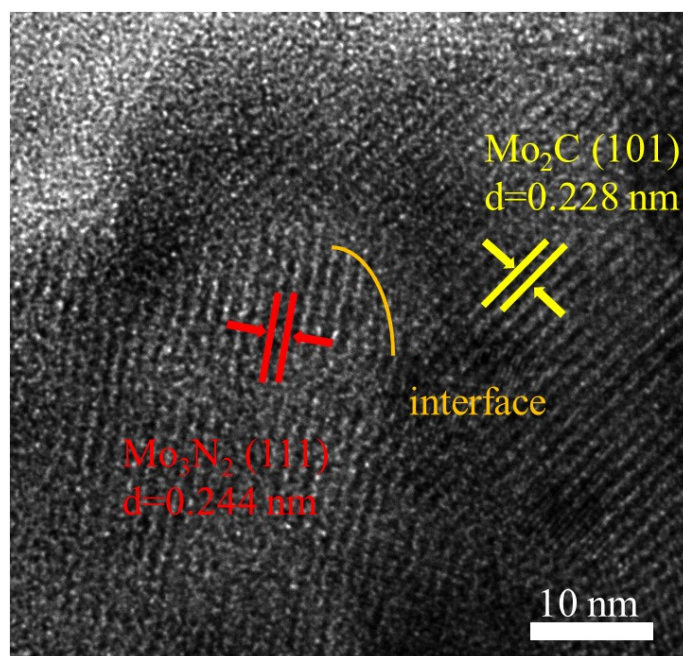

**Figure S2.** HRTEM image of Mo<sub>2</sub>C/Mo<sub>3</sub>N<sub>2</sub>/C

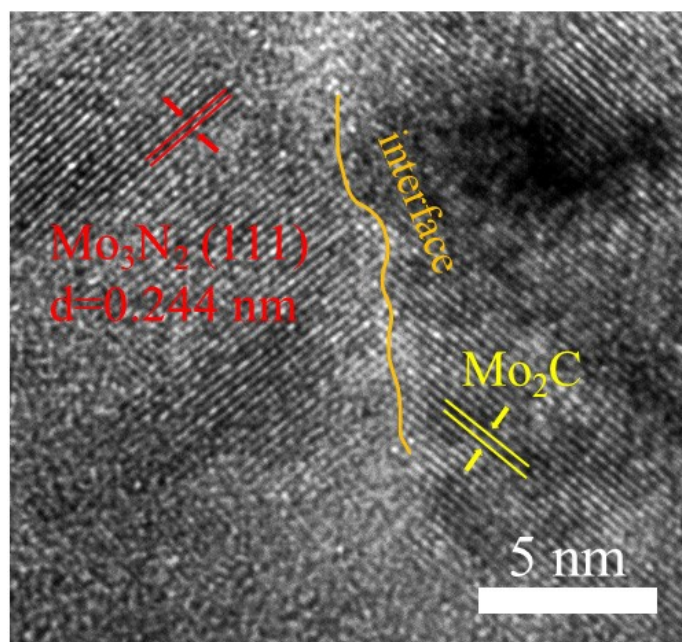

Figure S3. HRTEM image of  $\text{Mo}_2\text{C}/\text{Mo}_3\text{N}_2/\text{C}$

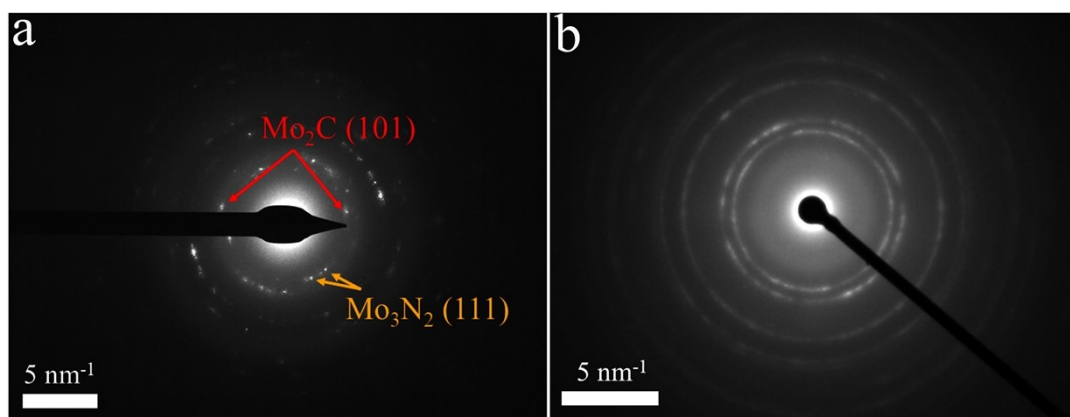

Figure S4. (a, b) SAED pattern of  $\text{Mo}_2\text{C}/\text{Mo}_3\text{N}_2/\text{C}$

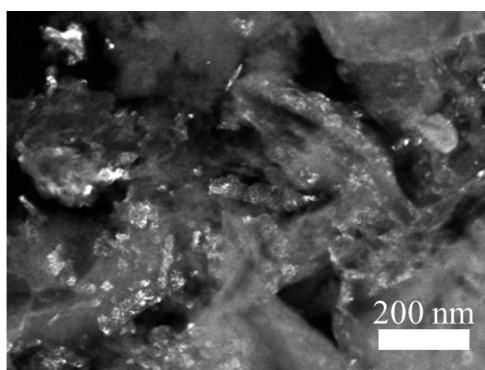

Figure S5. HAADF-STEM micrograph of  $\text{Mo}_2\text{C}/\text{Mo}_3\text{N}_2/\text{C}$ .

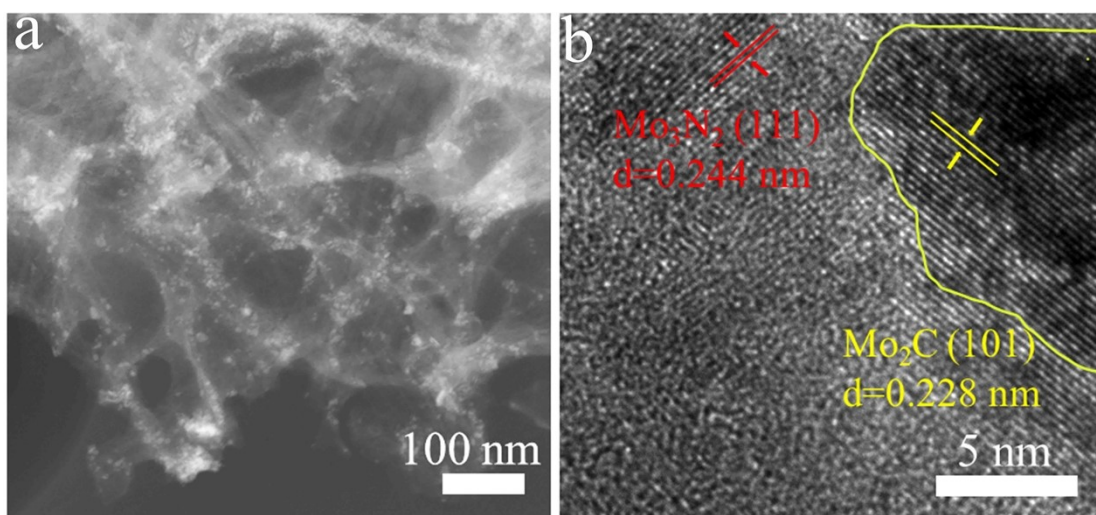

**Figure S6.** (a) TEM image of Mo<sub>2</sub>C/Mo<sub>3</sub>N<sub>2</sub>/C. (b) HRTEM image of Mo<sub>2</sub>C/Mo<sub>3</sub>N<sub>2</sub>/C

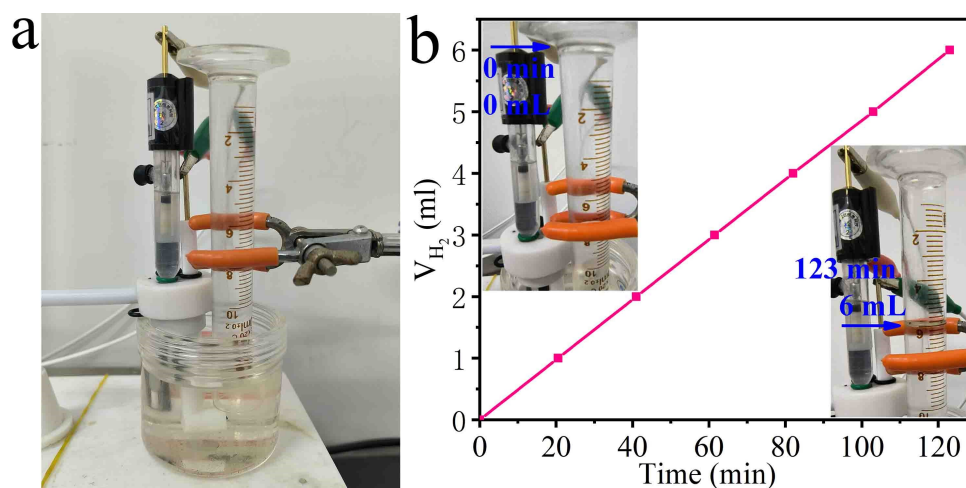

**Figure S7.** (a) Experimental device, (b) the experimental data of the Faradaic efficiency at 100 mA/cm<sup>2</sup> in 1 M KOH of Mo<sub>2</sub>C/Mo<sub>3</sub>N<sub>2</sub>/C

The Faradaic efficiency (FE) was obtained according to Figure S7 (b):

$$FE = \frac{\frac{V(H_2)}{Vm}}{\frac{I \times t}{2 \times F}} \times 100\% = \frac{\frac{6 \times 10^{-3} L}{22.4 L/mol}}{\frac{7 \times 10^{-3} A \times 7385 s}{2 \times 96485 C/mol}} \times 100\% \approx 100\%$$

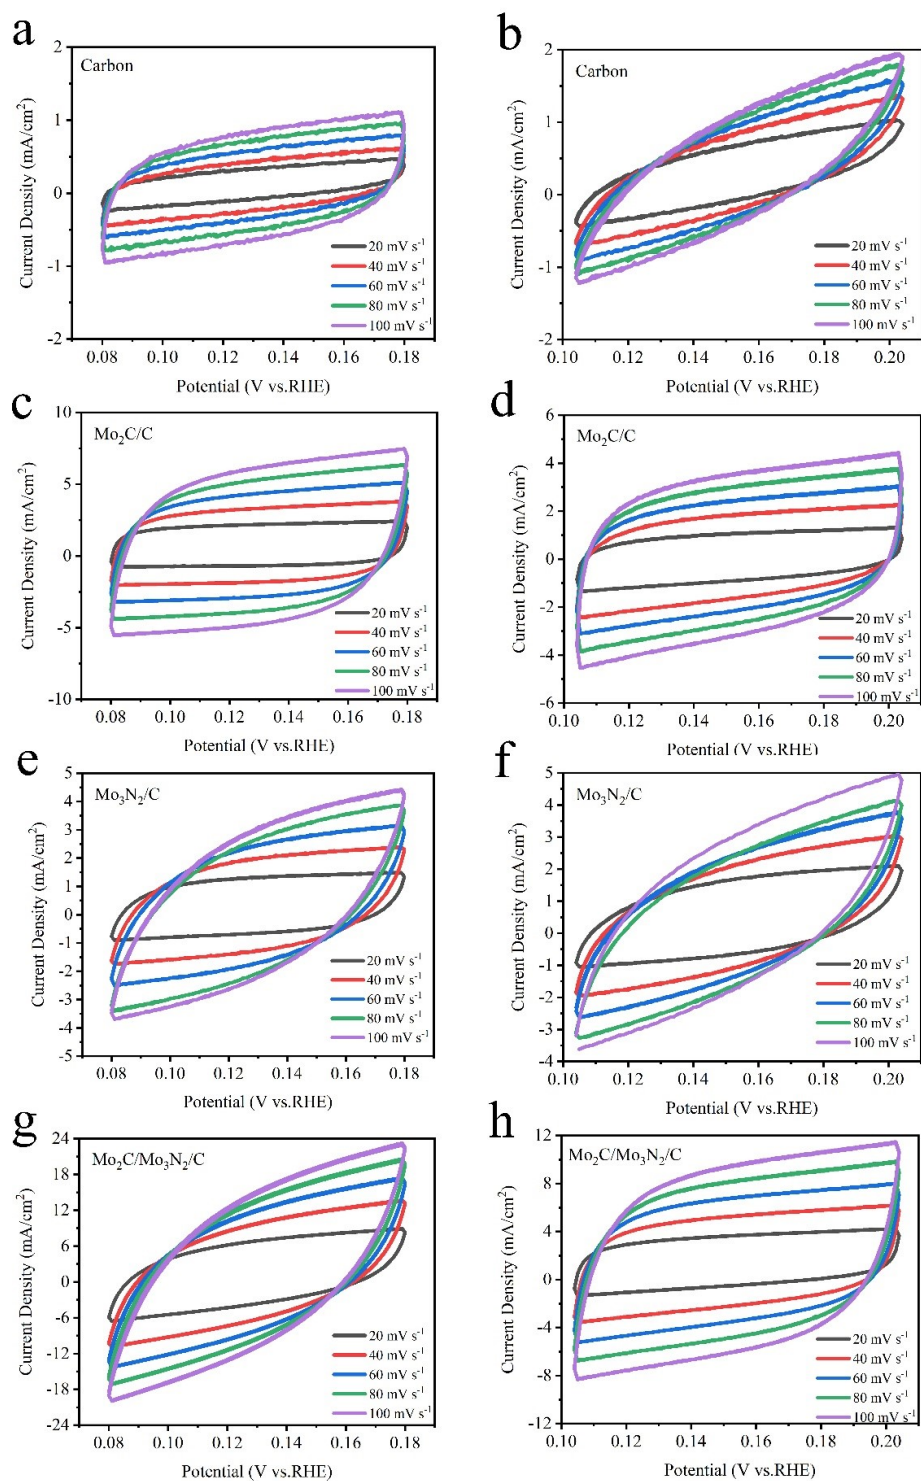

**Figure S8.** Typical cyclic voltammograms of (a) Carbon, (b) Mo<sub>2</sub>C/C, (c) Mo<sub>3</sub>N<sub>2</sub>/C, and (d) Mo<sub>2</sub>C/Mo<sub>3</sub>N<sub>2</sub>/C with scan rates ranging from 20 mV/s to 100 mV/s under 1 M KOH conditions. Typical cyclic voltammograms of (e) Carbon, (f) Mo<sub>2</sub>C/C, (g) Mo<sub>3</sub>N<sub>2</sub>/C and (h) Mo<sub>2</sub>C/Mo<sub>3</sub>N<sub>2</sub>/C with scan rates ranging from 20 mV/s to 100 mV/s under 0.5 M H<sub>2</sub>SO<sub>4</sub> conditions.



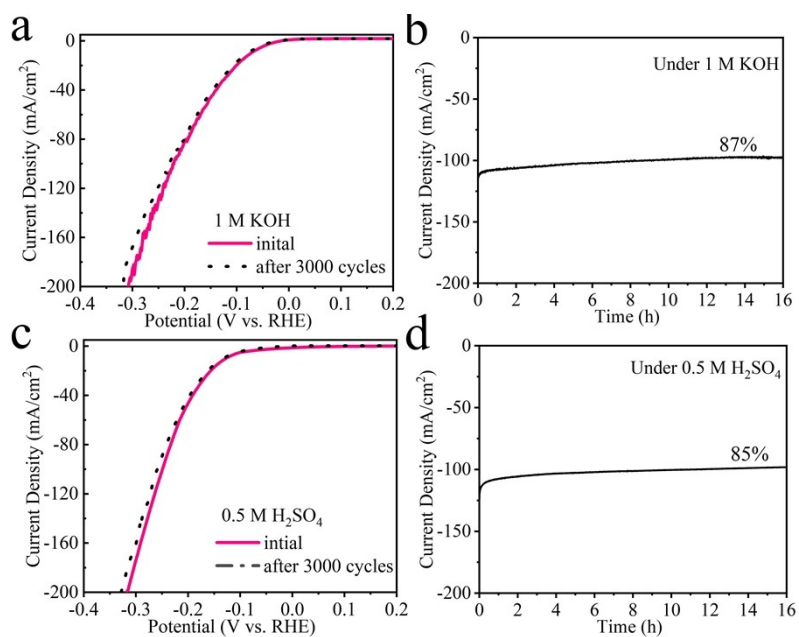

**Figure S9.** (a) The LSV curves of Mo<sub>2</sub>C/Mo<sub>3</sub>N<sub>2</sub>/C before and after 3000 CV cycles and (b) Chronoamperometry curve of Mo<sub>2</sub>C/Mo<sub>3</sub>N<sub>2</sub>/C under 1 M KOH; (c) The LSV curves of Mo<sub>2</sub>C/Mo<sub>3</sub>N<sub>2</sub>/C before and after 3000 CV cycles and (d) Chronoamperometry curve of Mo<sub>2</sub>C/Mo<sub>3</sub>N<sub>2</sub>/C under 0.5 M H<sub>2</sub>SO<sub>4</sub>.

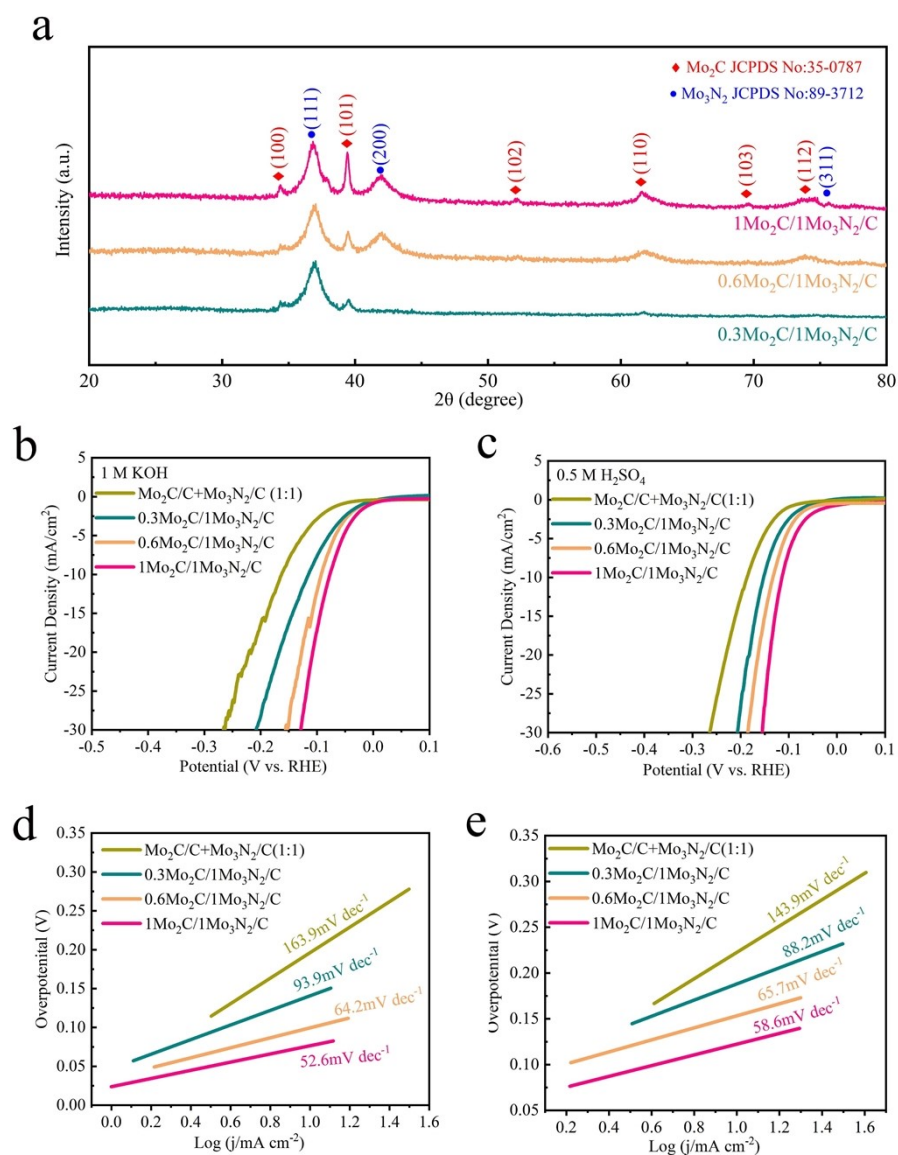

**Figure S10.** (a) XRD patterns of  $\text{Mo}_2\text{C}/\text{Mo}_3\text{N}_2/\text{C}$  with different ratio of  $\text{Mo}_2\text{C}$  and  $\text{Mo}_3\text{N}_2$ . b, c) Polarization curves and d, e) corresponding Tafel slopes of  $0.3\text{Mo}_2\text{C}/1\text{Mo}_3\text{N}_2/\text{C}$ ,  $0.6\text{Mo}_2\text{C}/1\text{Mo}_3\text{N}_2/\text{C}$ ,  $1\text{Mo}_2\text{C}/1\text{Mo}_3\text{N}_2/\text{C}$  and  $\text{Mo}_2\text{C}/\text{C}+\text{Mo}_3\text{N}_2/\text{C}$  (1:1).

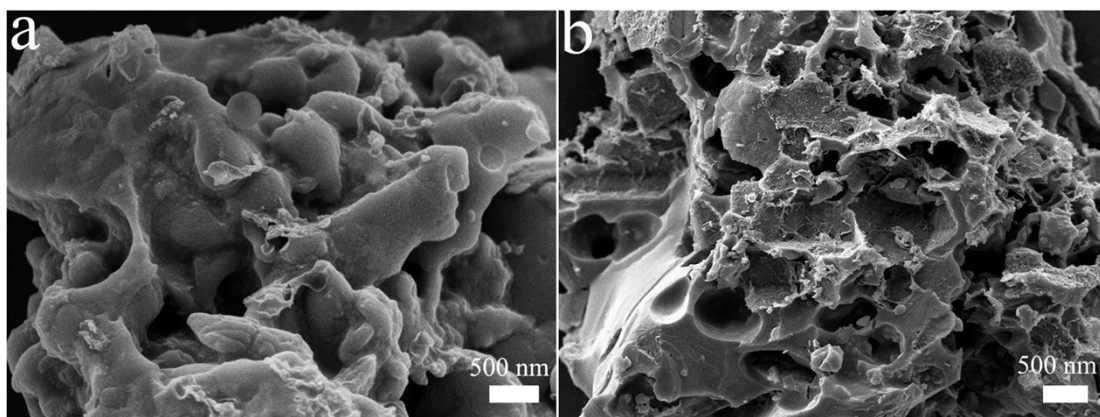

**Figure S11.** SEM image of 0.3Mo<sub>2</sub>C/1Mo<sub>3</sub>N<sub>2</sub>/C (a), 0.6Mo<sub>2</sub>C/1Mo<sub>3</sub>N<sub>2</sub>/C (b)

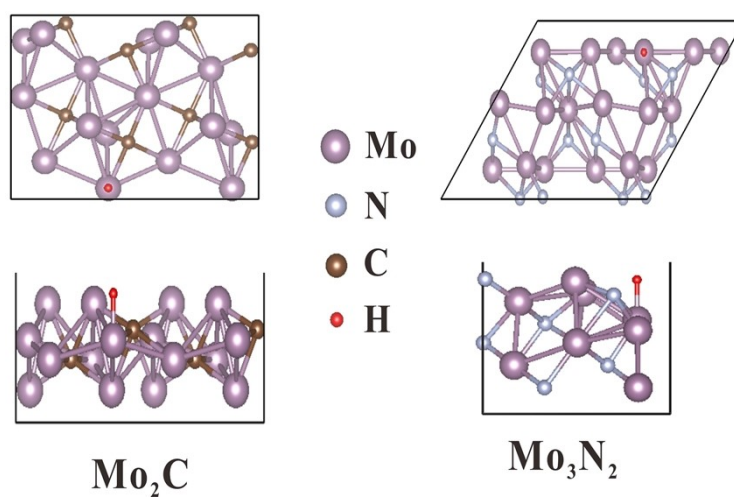

**Figure S12.** Sites for H<sub>ads</sub> adsorption on the surface of Mo<sub>2</sub>C (a) and Mo<sub>3</sub>N<sub>2</sub> (b)

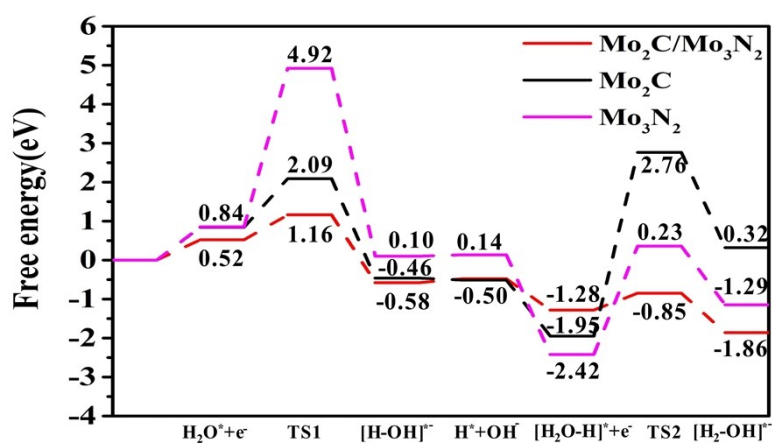

**Figure S13.** Relative energy profiles (TS-Transition State) of Mo<sub>2</sub>C/Mo<sub>3</sub>N<sub>2</sub>, Mo<sub>2</sub>C and Mo<sub>3</sub>N<sub>2</sub>

**Table S1.** Comparison of the HER performance of Mo<sub>2</sub>C/Mo<sub>3</sub>N<sub>2</sub>/C with Mo-based electrocatalysts of 10 mA/cm<sup>2</sup> in alkaline conditions.

| Catalysts                                                          | Support       | Loading<br>(mg/cm <sup>2</sup> ) | Electrolyte | Overpotential<br>(mV) | Tafel Slope<br>(mV/dec) | C <sub>dl</sub><br>(mF/cm <sup>2</sup> ) | Ref.      |
|--------------------------------------------------------------------|---------------|----------------------------------|-------------|-----------------------|-------------------------|------------------------------------------|-----------|
| Hierarchical β-Mo <sub>2</sub> C<br>nanotubes                      | Glassy carbon | 0.75                             | 0.1M KOH    | 112                   | 55                      | —                                        | [5]       |
| h-Mo <sub>2</sub> C/MoO <sub>2</sub>                               | Glassy carbon | 0.57                             | 1M KOH      | 94.7                  | 56.6                    | 139                                      | [6]       |
| Ni/Mo <sub>2</sub> C-PC                                            | Glassy carbon | 0.5                              | 1M KOH      | 179                   | 145                     | 11.2                                     | [7]       |
| 0.2rGo-MoS <sub>2</sub>                                            | Glassy carbon | 0.097                            | 1M KOH      | 314                   | 80                      | 14.67                                    | [8]       |
| Mo <sub>3</sub> N <sub>2</sub> @NC                                 | Glassy carbon | 0.5                              | 1M KOH      | 85                    | 48.9                    | 60.2                                     | [9]       |
| β-Mo <sub>2</sub> C@NPCC                                           | Glassy carbon | 0.1                              | 1M KOH      | 132                   | 49                      | 50                                       | [10]      |
| N,P-Mo <sub>x</sub> C NF                                           | Glassy carbon | 0.265                            | 1M KOH      | 135                   | 57.1                    | 51.4                                     | [11]      |
| Co <sub>0.60</sub> Mo <sub>0.40</sub> S <sub>x</sub>               | Glassy carbon | 0.2                              | 1M NaOH     | 167                   | 87                      | —                                        | [12]      |
| Ni/Mo <sub>2</sub> C-NCNFs                                         | Glassy carbon | 1.4                              | 1M KOH      | 143                   | 57.8                    | 29.41                                    | [13]      |
| MoC-Mo <sub>2</sub> C-31.4<br>HNWs                                 | Glassy carbon | 0.14                             | 1M KOH      | 120                   | 42                      | —                                        | [14]      |
| Fe-doped Co-Mo-S/NF                                                | Ni foam       | 4                                | 1M KOH      | 105                   | 50.3                    | —                                        | [15]      |
| Mo <sub>2</sub> C/C                                                | Glassy carbon | 1.42                             | 1M KOH      | 142                   | 115.4                   | 50.44                                    | This work |
| Mo <sub>3</sub> N <sub>2</sub> /C                                  | Glassy carbon | 1.42                             | 1M KOH      | 187                   | 145.6                   | 20.31                                    | This work |
| Dual-phased<br>Mo <sub>2</sub> C/Mo <sub>3</sub> N <sub>2</sub> /C | Glassy carbon | 1.42                             | 1M KOH      | 76                    | 52.6                    | 94.92                                    | This work |

**Table S2.** Comparison of ECSA of HER electrocatalysts under 1 M KOH or and 0.5 M H<sub>2</sub>SO<sub>4</sub> conditions

| electrocatalyst                                     | 1 M KOH<br>(cm <sup>2</sup> /mg) | 0.5 M H <sub>2</sub> SO <sub>4</sub><br>(cm <sup>2</sup> /mg) |
|-----------------------------------------------------|----------------------------------|---------------------------------------------------------------|
| Carbon                                              | 117.43                           | 83.80                                                         |
| Mo <sub>2</sub> C/C                                 | 888.03                           | 517.25                                                        |
| Mo <sub>3</sub> N <sub>2</sub> /C                   | 357.57                           | 253.35                                                        |
| Mo <sub>2</sub> C/Mo <sub>3</sub> N <sub>2</sub> /C | 1671.13                          | 1344.19                                                       |

**Table S3.** Comparison of the HER performance for Mo<sub>2</sub>C/Mo<sub>3</sub>N<sub>2</sub>/C catalyst with Mo-based electrocatalysts of 10 mA/cm<sup>2</sup> in acidic condition.

| Catalysts                                                          | Support       | Loading<br>(mg/cm <sup>2</sup> ) | Electrolyte                         | Overpotential<br>(10mA/cm <sup>2</sup> ) | Tafel Slope<br>(mV/dec) | C <sub>dl</sub><br>(mF/cm <sup>2</sup> ) | Ref.      |
|--------------------------------------------------------------------|---------------|----------------------------------|-------------------------------------|------------------------------------------|-------------------------|------------------------------------------|-----------|
| N,P(S)-Mo <sub>2</sub> C/C                                         | Glassy carbon | 0.213                            | 0.5M H <sub>2</sub> SO <sub>4</sub> | 210<br>(223)                             | 64<br>(44)              | —                                        | [16]      |
| Mo <sub>2</sub> C@C                                                | Glassy carbon | —                                | 0.5M H <sub>2</sub> SO <sub>4</sub> | 170                                      | 58                      | 20.2                                     | [17]      |
| MoC-Mo <sub>2</sub> C-790                                          | Ni foam       | —                                | 0.5M H <sub>2</sub> SO <sub>4</sub> | 114                                      | 62                      | —                                        | [18]      |
| 0.2rGo-MoS <sub>2</sub>                                            | Glassy carbon | 0.097                            | 0.5M H <sub>2</sub> SO <sub>4</sub> | 146                                      | 51                      | 14.67                                    | [8]       |
| Mo <sub>3</sub> N <sub>2</sub> @NC                                 | Glassy carbon | 0.5                              | 0.5M H <sub>2</sub> SO <sub>4</sub> | 129                                      | 86.7                    | 62.4                                     | [9]       |
| Mo <sub>2</sub> C-WC/NCA                                           | Glassy carbon | 1.07                             | 0.5M H <sub>2</sub> SO <sub>4</sub> | 126                                      | 72                      | 101                                      | [19]      |
| N,P-Mo <sub>x</sub> C NF                                           | Glassy carbon | 0.265                            | 0.5M H <sub>2</sub> SO <sub>4</sub> | 107                                      | 65.1                    | 38.3                                     | [11]      |
| Mo <sub>2</sub> C/NCF                                              | Glassy carbon | 0.28                             | 0.5M H <sub>2</sub> SO <sub>4</sub> | 144                                      | 55                      | 28.7                                     | [20]      |
| Ni/Mo <sub>2</sub> C-NCNFs                                         | Glassy carbon | 1.4                              | 0.5M H <sub>2</sub> SO <sub>4</sub> | 195                                      | 77.8                    | —                                        | [13]      |
| MoC-Mo <sub>2</sub> C-31.4<br>HNWs                                 | Glassy carbon | 0.14                             | 0.5M H <sub>2</sub> SO <sub>4</sub> | 126                                      | 43                      | 6.68                                     | [14]      |
| FeN <sub>0.023</sub> /Mo <sub>2</sub> C/C                          | Glassy carbon | 0.25                             | 0.5M H <sub>2</sub> SO <sub>4</sub> | 76                                       | 65.2                    | 5.32                                     | [21]      |
| Mo <sub>2</sub> C/C                                                | Glassy carbon | 1.42                             | 0.5M H <sub>2</sub> SO <sub>4</sub> | 164                                      | 102.2                   | 29.38                                    | This work |
| Mo <sub>3</sub> N <sub>2</sub> /C                                  | Glassy carbon | 1.42                             | 0.5M H <sub>2</sub> SO <sub>4</sub> | 249                                      | 124.2                   | 14.39                                    | This work |
| Dual-phased<br>Mo <sub>2</sub> C/Mo <sub>3</sub> N <sub>2</sub> /C | Glassy carbon | 1.42                             | 0.5M H <sub>2</sub> SO <sub>4</sub> | 121                                      | 59.4                    | 76.36                                    | This work |

**Table S4.** Comparison of the lattice parameters of Mo<sub>2</sub>C/Mo<sub>3</sub>N<sub>2</sub> before and after structural optimization

| <b>The lattice parameters before optimization</b> |         |          |         |          |         |
|---------------------------------------------------|---------|----------|---------|----------|---------|
| a                                                 | b       | c        | alpha   | beta     | gamma   |
| 10.17720                                          | 9.63150 | 20.44738 | 81.2960 | 90.00000 | 90.0000 |
| <b>The lattice parameters after optimization</b>  |         |          |         |          |         |
| a                                                 | b       | c        | alpha   | beta     | gamma   |
| 10.17720                                          | 9.63150 | 20.44738 | 81.2960 | 90.0000  | 90.0000 |

**Table S5.** Comparison of atomic coordinates of Mo<sub>2</sub>C/Mo<sub>3</sub>N<sub>2</sub> before and after structural optimization

| site | Atomic coordinates before optimization |             |             | Atomic coordinates after optimization |             |             |
|------|----------------------------------------|-------------|-------------|---------------------------------------|-------------|-------------|
|      | X                                      | Y           | Z           | X                                     | Y           | Z           |
| Mo1  | 1.83660053                             | 7.411181947 | 1.779276731 | 1.83660053                            | 7.411181947 | 1.779276731 |
| Mo2  | 1.000090945                            | 3.813931133 | 1.047299804 | 1.000090945                           | 3.813931133 | 1.047299804 |
| Mo3  | 2.387369574                            | 6.789950573 | 4.141389802 | 2.387369574                           | 6.789950573 | 4.141389802 |
| Mo4  | 3.40261064                             | 9.81192425  | 3.426547192 | 3.40261064                            | 9.81192425  | 3.426547192 |
| Mo5  | 1.000090945                            | 9.649132685 | 4.082249369 | 1.000090945                           | 9.649132685 | 4.082249369 |
| Mo6  | 1.83660053                             | 3.123135497 | 3.350272593 | 1.83660053                            | 3.123135497 | 3.350272593 |
| Mo7  | 3.40261064                             | 4.417228707 | 1.703002282 | 3.40261064                            | 4.417228707 | 1.703002282 |
| Mo8  | 2.387369574                            | 0.915017641 | 0.988159597 | 2.387369574                           | 0.915017641 | 0.988159597 |
| Mo9  | 0.950591699                            | 8.103180924 | 6.261444896 | 0.935295006                           | 8.089854226 | 6.254346671 |
| Mo10 | 0.804364799                            | 5.160955968 | 5.818057602 | 0.798505644                           | 5.158648716 | 5.81583007  |
| Mo11 | 2.800002812                            | 7.558313627 | 8.296101425 | 2.797020422                           | 7.586745262 | 8.289173066 |
| Mo12 | 3.110006401                            | 9.813495452 | 6.871402553 | 3.125875277                           | 9.82169344  | 6.807156506 |
| Mo13 | 0.922966903                            | 10.03551522 | 8.126766827 | 0.932148528                           | 9.874271468 | 8.124778433 |
| Mo14 | 2.084598729                            | 4.218440141 | 7.825484991 | 2.10326862                            | 4.118570113 | 7.74421501  |
| Mo15 | 3.55945895                             | 5.54540026  | 6.298566012 | 3.557960627                           | 5.5465968   | 6.297357676 |
| Mo16 | 2.8412995                              | 2.78139994  | 5.862607037 | 2.837187605                           | 2.779481156 | 5.856874967 |
| Mo17 | 8.358587698                            | 1.201790883 | 7.290471318 | 8.358715693                           | 1.193704116 | 7.297276796 |
| Mo18 | 6.20495496                             | 10.30183525 | 4.85785457  | 6.192772444                           | 10.29985061 | 4.859035499 |
| Mo19 | 6.413431106                            | 2.173053728 | 1.56583724  | 6.413431106                           | 2.173053728 | 1.56583724  |
| Mo20 | 8.7983976                              | 1.395939365 | 4.703752183 | 8.797366973                           | 1.394335306 | 4.701671928 |
| Mo21 | 6.413431106                            | 4.580928789 | 1.56583724  | 6.413431106                           | 4.580928789 | 1.56583724  |
| Mo22 | 9.673490892                            | 3.677558875 | 3.947229486 | 9.673490892                           | 3.677558875 | 3.947229486 |
| Mo23 | 5.146205513                            | 7.470653536 | 7.127294057 | 5.145554016                           | 7.464363075 | 7.126021268 |
| Mo24 | 8.659464863                            | 3.72033312  | 1.79659522  | 8.659464863                           | 3.72033312  | 1.79659522  |



|      |             |             |             |             |             |             |
|------|-------------|-------------|-------------|-------------|-------------|-------------|
| Mo25 | 7.651637159 | 8.453349553 | 6.540591762 | 7.651510377 | 8.456724072 | 6.541229663 |
| Mo26 | 6.413431106 | 9.396678911 | 1.56583724  | 6.413431106 | 9.396678911 | 1.56583724  |
| Mo27 | 8.791390667 | 8.391709576 | 4.278345071 | 8.791390667 | 8.391709576 | 4.278345071 |
| Mo28 | 5.451398697 | 2.005607244 | 6.697177384 | 5.455126305 | 2.009462967 | 6.696728625 |
| Mo29 | 8.659464863 | 8.536083529 | 1.79659522  | 8.659464863 | 8.536083529 | 1.79659522  |
| Mo30 | 7.914469664 | 3.425710964 | 6.160791531 | 7.915615547 | 3.422036272 | 6.153100583 |
| Mo31 | 7.357905841 | 6.127618381 | 7.120654229 | 7.361409611 | 6.124480512 | 7.121292129 |
| Mo32 | 5.889067877 | 5.350765513 | 4.994741171 | 5.889501602 | 5.352552167 | 4.993556928 |
| Mo33 | 6.413431106 | 6.98880385  | 1.56583724  | 6.413431106 | 6.98880385  | 1.56583724  |
| Mo34 | 8.507290471 | 5.915219936 | 4.718530213 | 8.508520066 | 5.913677635 | 4.709505938 |
| C1   | 2.685191555 | 7.896579701 | 0.282436568 | 2.685191555 | 7.896579701 | 0.282436568 |
| C2   | 1.863832091 | 5.253289161 | 2.564774511 | 1.863832091 | 5.253289161 | 2.564774511 |
| C3   | 1.863832091 | 0.437539034 | 2.564774511 | 1.863832091 | 0.437539034 | 2.564774511 |
| C4   | 2.685191555 | 3.066935895 | 0.241075186 | 2.685191555 | 3.066935895 | 0.241075186 |
| C5   | 2.598818707 | 8.861996918 | 5.171332415 | 2.635823943 | 8.744443638 | 5.158667769 |
| C6   | 1.742878469 | 6.355750856 | 7.225116324 | 1.745603354 | 6.338732791 | 7.2450846   |
| C7   | 1.898789569 | 1.933987698 | 7.477739416 | 1.890862865 | 1.869340217 | 7.536100995 |
| C8   | 2.779671422 | 4.613115348 | 4.617794325 | 2.779671422 | 4.613115348 | 4.617794325 |
| N1   | 7.882404343 | 1.950046616 | 3.098603641 | 7.882404343 | 1.950046616 | 3.098603641 |
| N2   | 5.624097078 | 0.661815156 | 3.067007082 | 5.624097078 | 0.661815156 | 3.067007082 |
| N3   | 9.626350139 | 9.591137067 | 6.078046367 | 9.614631678 | 9.590329656 | 6.083815784 |
| N4   | 5.645616511 | 8.912758193 | 6.069918104 | 5.651958602 | 8.906043524 | 6.064078212 |
| N5   | 9.448606596 | 4.736764041 | 0.150798652 | 9.448606596 | 4.736764041 | 0.150798652 |
| N6   | 7.203147904 | 3.684419794 | 0.064759583 | 7.203147904 | 3.684419794 | 0.064759583 |
| N7   | 5.835816152 | 3.77788495  | 6.061220007 | 5.834663596 | 3.782348579 | 6.062210892 |
| N8   | 9.448606596 | 9.552514163 | 0.150798652 | 9.448606596 | 9.552514163 | 0.150798652 |
| N9   | 7.203147904 | 8.500169629 | 0.064759583 | 7.203147904 | 8.500169629 | 0.064759583 |
| N10  | 7.882404343 | 6.765796452 | 3.098603641 | 7.882404343 | 6.765796452 | 3.098603641 |
| N11  | 5.624097078 | 5.477564704 | 3.067007082 | 5.624097078 | 5.477564704 | 3.067007082 |

|     |             |             |             |             |             |             |
|-----|-------------|-------------|-------------|-------------|-------------|-------------|
| N12 | 9.1496542   | 4.87632558  | 6.528690308 | 9.154138249 | 4.874882586 | 6.528380695 |
| H1  | 1.898789569 | 2.150588352 | 8.892564985 | 1.895819614 | 2.158816209 | 8.706443783 |

## References

- [1] H. Liu, J. Cheng, W. He, Y. Li, J. Mao, X. Zheng, C. Chen, C. Cui, Q. Appl. Catal. B-Environ. 304 (2022).
- [2] Perdew, Burke, Phys. Rev. Lett. 77 (1996) 3865-3868.
- [3] <hammer1999.pdf>.
- [4] J.K. Norskov, T. Bligaard, A. Logadottir, J.R. Kitchin, J.G. Chen, S. Pandelov, J.K. Norskov, J. Electrochem. Soc. 152 (2005) J23-J26.
- [5] Y Liu, G Yu, GD Li, Y Sun, T Asefa, W Chen, X Zou, Angew. Chem. Int. Ed. Engl. 2015,54(37):10752-10757.
- [6] Z Liu, S Zhou, S Xue, Z Guo, J Li, K Qu, W Cai, Chem. Eng. J. 2021,421.
- [7] ZY Yu, Y Duan, MR Gao, CC Lang, YR Zheng, SH Yu, Chem. Sci. 2017,8(2):968-973.
- [8] Y Zhang, H Zhou, H Wang, Y Zhang, DD Dionysiou, Chem. Eng. J. 2021,418.
- [9] Q Wu, D Zhao, X Yu, J Xu, N Wang, W Zhou, L Li, Int. J. Hydrogen Energy. 2022,47(8):5064-5073.
- [10] H Yang, X Chen, G Hu, WT Chen, SJ Bradley, W Zhang, G Verma, T Nann, DE Jiang, PE Kruger, X Wang, H Tian, GIN Waterhouse, SG Telfer, S Ma, Chem. Sci. 2020,11(13):3523-3530.
- [11] L Ji, J Wang, X Teng, H Dong, X He, Z Chen, ACS Appl. Mater. Interfaces. 2018,10(17):14632-14640.
- [12] A Mukherji, R Bal, R Srivastava, ChemElectroChem. 2020,7(13):2740-2751.
- [13] M Li, Y Zhu, H Wang, C Wang, N Pinna, X Lu, Adv. Energy Mater. 2019,9(10).
- [14] H Lin, Z Shi, S He, X Yu, S Wang, Q Gao, Y Tang, Chem. Sci. 2016,7(5):3399-3405.
- [15] F Yuan, Z Liu, G Qin, Y Ni, Dalton Trans. 2020,49(42):15009-15022.
- [16] D Wang, T Liu, J Wang, Z Wu, Carbon. 2018,139:845-852.
- [17] Y Zhao, S Wang, H Liu, X Guo, X Zeng, W Wu, J Zhang, G Wang, J. Phys. Chem. Solids. 2019,132:230-235.
- [18] W Liu, X Wang, F Wang, K Du, Z Zhang, Y Guo, H Yin, D Wang, Nat. Commun.

2021,12(1):6776.

[19]X. Zhang, Z. Zhu, X. Liang, F.-X. Ma, J. Zhang, Y. Tan, Z. Pan, Y. Bo, C.-M.

Lawrence Wu, Chem. Eng. J. 408 (2021).

[20]Y.Y. Chen, Y. Zhang, W.J. Jiang, X. Zhang, Z. Dai, L.J. Wan, J.S. Hu, ACS Nano.

10 (2016) 8851-8860.

[21]N Han, S Luo, C Deng, S Zhu, Q Xu, Y Min, ACS Appl. Mater. Interfaces.

2021,13(7):8306-8314.
